# Supplementary material
Source: publisher figshare collection journal article supplement (https://frontiersin.figshare.com/ndownloader/files/24868139)
Supplement: Supplementary file [file 24868139]

# Supplementary Material

## Supplementary Figures

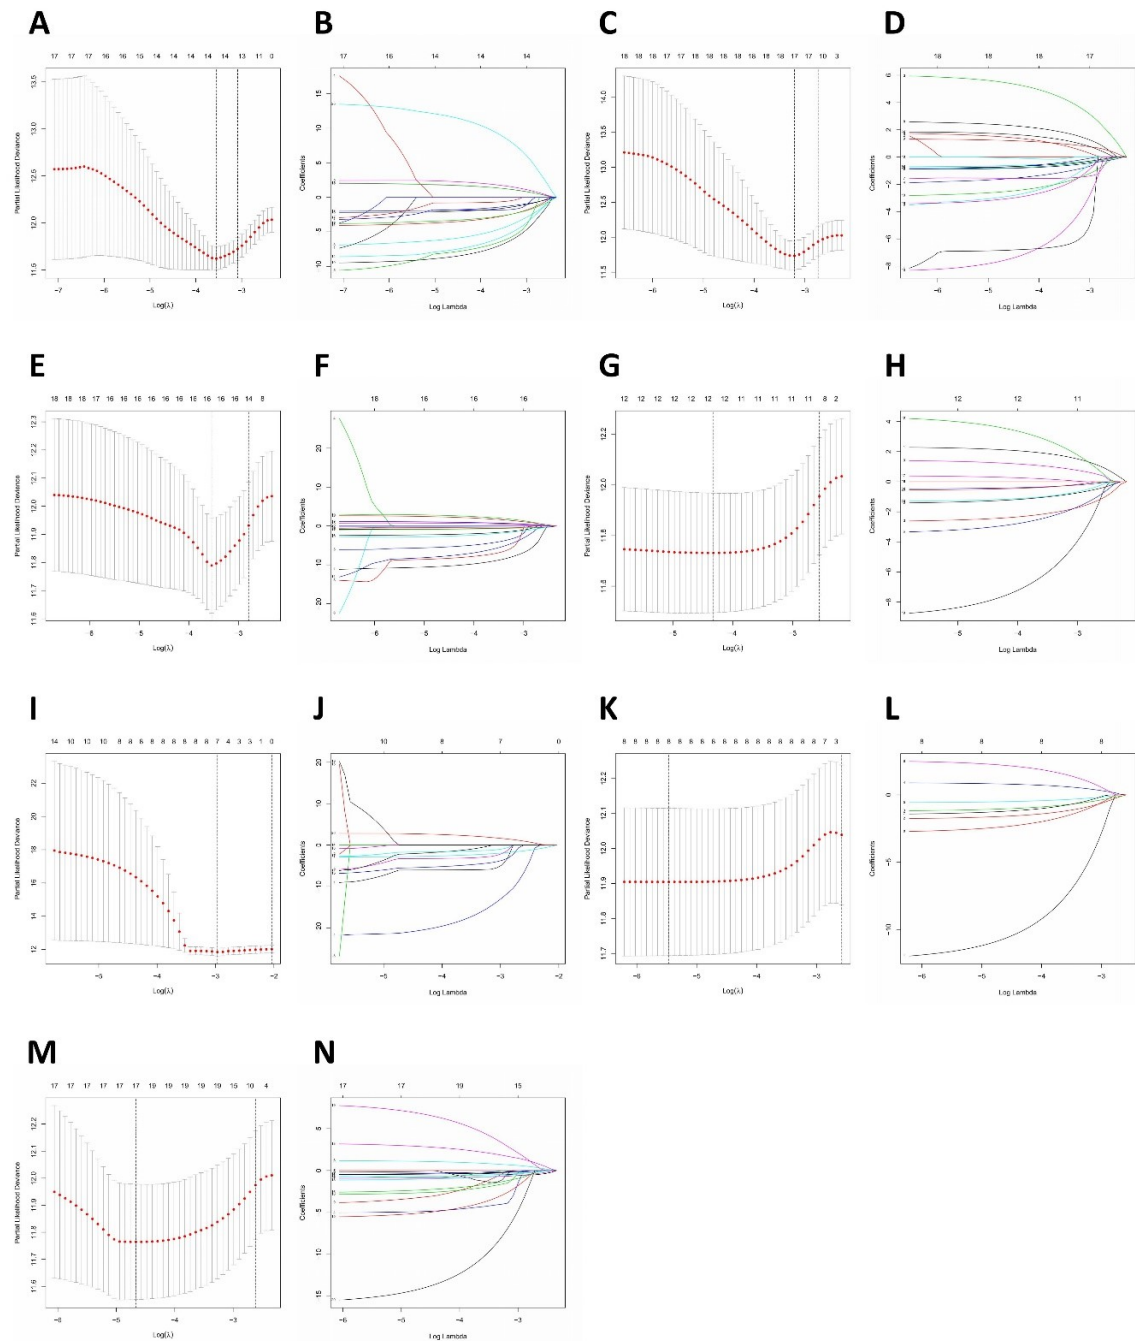

**Supplementary Figure 1.** LASSO regression analysis of survival-related AS events. AA cohort (A, B), AD cohort (C, D), AP cohort (E, F), AT cohort (G, H), ES cohort (I, J), ME cohort (K, L), and RI cohort (M, N).

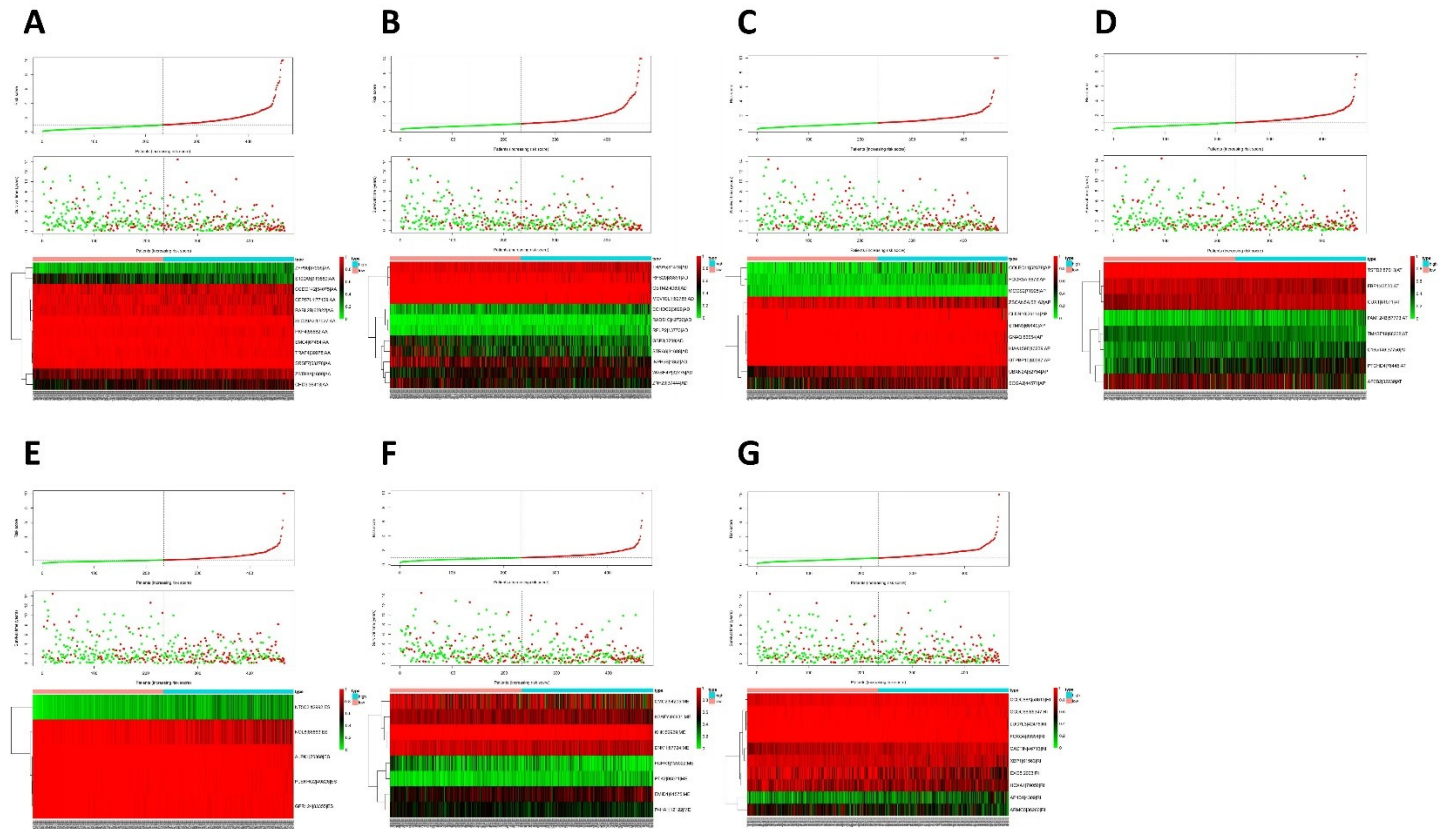

**Supplementary Figure 2.** Risk scores analyses of prognostic models. The upper part represents the risk score curves, the middle part indicates the distribution of patients' survival time and status, and the bottom shows the PSI value heatmap for the final prognostic model. AA cohort (A), AD cohort (B), AP cohort (C), AT cohort (D), ES cohort (E), ME cohort (F), and RI cohort (G).
